# Supplementary material for: Thermal phase transition behaviours of the blue phase of bent-core nematogen and chiral dopant mixtures under different boundary conditions
Source: Royal Society of Chemistry journal article supplement (doi:10.1039/c4sm01662a), 2014-01-01
Supplement: c4sm01662a1.pdf [file c4sm01662a1.pdf]

## Supporting Information for:

# Thermal phase transition behaviours of the blue phase of bent-core nematogen and chiral dopant mixtures under different boundary conditions

Min-Jun Gim,<sup>a</sup> Gohyun Han,<sup>a</sup> Suk-Won Choi,<sup>\*b</sup> and Dong Ki Yoon<sup>\*a</sup>

<sup>a</sup> Graduate School of Nanoscience and Technology and Center for Nature-inspired Technology in KAIST Institute for the NanoCentury, KAIST, Daejeon, 305-701, Republic of Korea. Fax: +82 42 350 1110; Tel: +82 42 350 1156; E-mail: [nandk@kaist.ac.kr](mailto:nandk@kaist.ac.kr)

<sup>b</sup> Department of Advanced Materials Engineering for Information & Electronics, Kyung Hee University, Yongin, Gyeonggi-do, 446-701, Republic of Korea.

**Figure S1.**

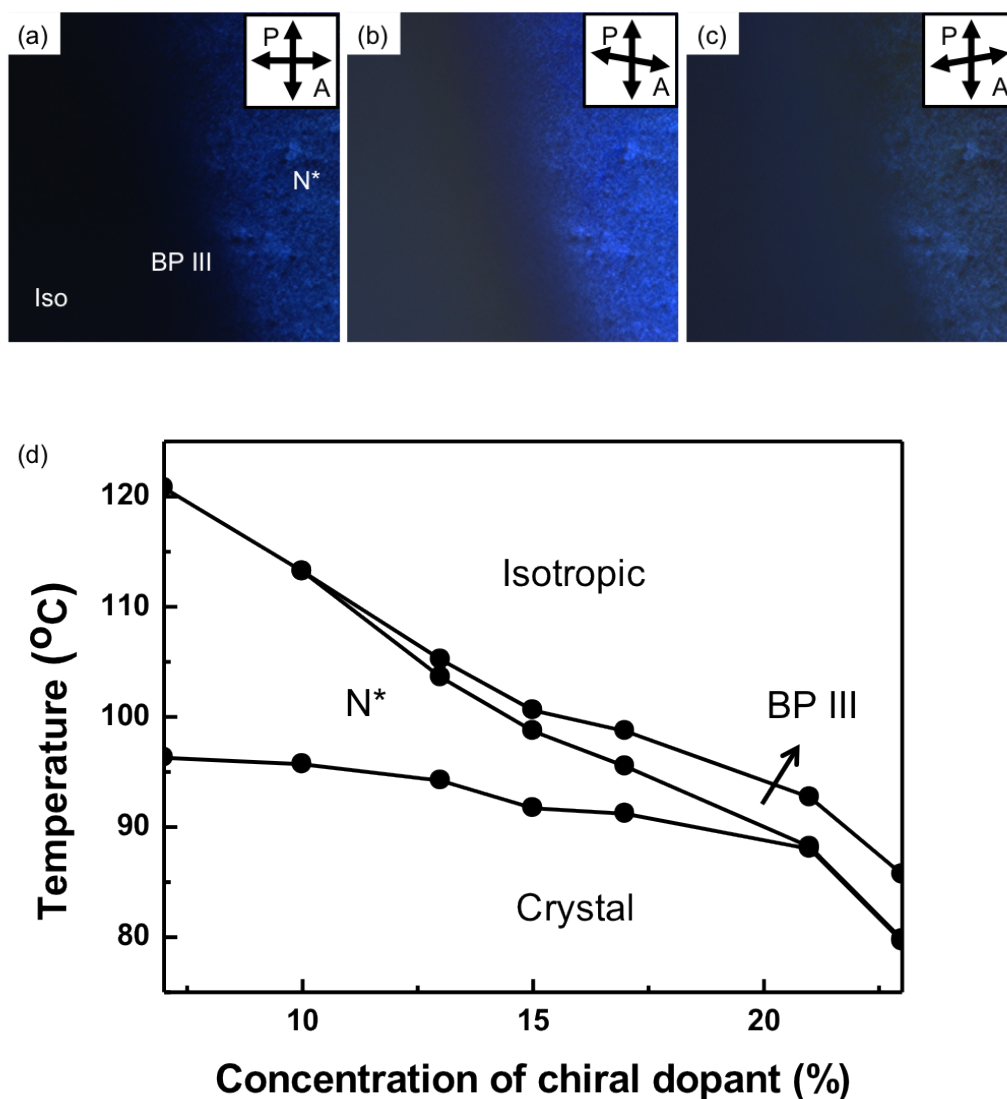

**Fig S1.** (a) The DTLM images of a contact cell for BNC and chiral dopant. The BP mixture consisting of 23 wt% of chiral dopant was injected from left, whereas pure BCN was injected from right. The contact cell exhibits an approximate concentration gradient between 0 and 23 wt% of chiral dopant at 90 °C. The analyzer was slightly rotated in (b) clockwise and (c) counter-clockwise directions, showing that the BP III is at isotropic/N\* phases boundaries. (d) A phase diagram obtained by DTLM as a function of the concentration of the chiral dopant in a sandwich cell. The temperature rate was -0.2 °C/min.
